# Supplementary material for: Drug therapy management in patients with renal impairment: how to use creatinine-based formulas in clinical practice
Source: PubMed Central journal article supplement (PMC5110609; doi:10.1007/s00228-016-2113-2), 2016-08-27
Supplement: 228_2016_2113_MOESM1_ESM.pdf [file 228_2016_2113_MOESM1_ESM.pdf]

## Online Resource 1 The effects of the inaccuracy of the eGFR in drug dosing

| mGFR<br>(ml/min/1.73m <sup>2</sup> ) | eGFR (mGFR $\pm$ 30%)* | Renal function groups for drug dosing[44] |       |       |       |      |
|--------------------------------------|------------------------|-------------------------------------------|-------|-------|-------|------|
|                                      |                        | < 10                                      | 10-30 | 30-50 | 50-80 | > 80 |
| 100                                  | 70-130                 |                                           |       |       |       |      |
| 60                                   | 42-78                  |                                           |       |       |       |      |
| 40                                   | 28-52                  |                                           |       |       |       |      |
| 20                                   | 14-26                  |                                           |       |       |       |      |

eGFR = estimated glomerular filtration rate; mGFR = measured glomerular filtration rate

\* An accuracy expressed as P<sub>30%</sub> (eGFR falls within  $\pm$  30% of the mGFR) of 80% or higher has been indicated as sufficient.[24, 56, 57]

The grey parts in the table illustrate the effects of the inaccuracy of the eGFR (mGFR  $\pm$  30%). The eGFR may lead to a different renal function group than the renal function group to which the patient actually belongs according to the mGFR.
